# Combinatorial roles for BMPs and Endothelin 1 in patterning the dorsal-ventral axis of the craniofacial skeleton

Courtney Alexander<sup>1</sup>, Elizabeth Zuniga<sup>2</sup>, Ira L. Blitz<sup>1</sup>, Naoyuki Wada<sup>1,\*</sup>, Pierre Le Pabic<sup>1</sup>, Yashar Javidan<sup>1</sup>, Tailin Zhang<sup>1</sup>, Ken W. Cho<sup>1</sup>, J. Gage Crump<sup>2</sup> and Thomas F. Schilling<sup>1,†</sup>

## SUMMARY

Bone morphogenetic proteins (BMPs) play crucial roles in craniofacial development but little is known about their interactions with other signals, such as Endothelin 1 (Edn1) and Jagged/Notch, which pattern the dorsal-ventral (DV) axis of the pharyngeal arches. Here, we use transgenic zebrafish to monitor and perturb BMP signaling during arch formation. With a BMP-responsive transgene, *Tg(Bre:GFP)*, we show active BMP signaling in neural crest (NC)-derived skeletal precursors of the ventral arches, and in surrounding epithelia. Loss-of-function studies using a heat shock-inducible, dominant-negative BMP receptor 1a [*Tg(hs70l:dnBmpr1a-GFP)*] to bypass early roles show that BMP signaling is required for ventral arch development just after NC migration, the same stages at which we detect *Tg(Bre:GFP)*. Inhibition of BMP signaling at these stages reduces expression of the ventral signal Edn1, as well as ventral-specific genes such as *hand2* and *dlx6a* in the arches, and expands expression of the dorsal signal *jag1b*. This results in a loss or reduction of ventral and intermediate skeletal elements and a mis-shapen dorsal arch skeleton. Conversely, ectopic BMP causes dorsal expansion of ventral-specific gene expression and corresponding reductions/transformations of dorsal cartilages. Soon after NC migration, BMP is required to induce Edn1 and overexpression of either signal partially rescues ventral skeletal defects in embryos deficient for the other. However, once arch primordia are established the effects of BMPs become restricted to more ventral and anterior (palate) domains, which do not depend on Edn1. This suggests that BMPs act upstream and in parallel to Edn1 to promote ventral fates in the arches during early DV patterning, but later acquire distinct roles that further subdivide the identities of NC cells to pattern the craniofacial skeleton.

**KEY WORDS:** Neural crest, Pharyngeal arch, Branchial arch, Craniofacial, *Xenopus*, Zebrafish

## INTRODUCTION

How do cartilages and bones acquire their distinct three-dimensional shapes and sizes during development? The craniofacial skeleton derives from cranial neural crest (NC) cells that migrate from the neural tube into the pharyngeal arches. Although cranial NC cells acquire their anterior-posterior identities (mandibular versus hyoid arch) prior to migration, patterning events at post-migratory stages largely determine the morphogenesis of individual skeletal elements (Trainor and Krumlauf, 2000; Schilling et al., 2001; Knight and Schilling, 2006). Overlapping expression domains of transcription factors of the Dlx family, as well as *Hand2* (Clouthier et al., 2010) pattern each pharyngeal segment along its dorsal-ventral (D-V) axis (equivalent to the proximal-distal axis in mice). These early domains are induced by signals from surrounding epithelia, including the endoderm and ectoderm that line each arch (David et al., 2002; Trainor and Krumlauf, 2000); in the mandibular arch, for example, they roughly determine ventral (e.g. lower jaw or mandible), intermediate (jaw joint) and dorsal (e.g. upper jaw) identities. However, how multiple signals are integrated to determine craniofacial patterning remains largely unknown.

Endothelin 1 (Edn1), a small, secreted ligand produced by ventral pharyngeal ectoderm, mesoderm and endoderm, induces ventral and intermediate skeletal identities in the arches (Thomas et al., 1998; Clouthier et al., 2000; Miller et al., 2000; Miller et al., 2003). In mice and zebrafish deficient in *Edn1* or its receptor *Ednra*, the mandible is reduced and fuses with the upper jaw instead of forming a joint (Ozeki et al., 2004; Miller et al., 2000; Maemura et al., 1996; Clouthier et al., 1998; Yanagisawa et al., 1998b). Disruptions of Edn1 target genes also cause ventral- and intermediate-specific defects: (1) mice with a combined loss of *Dlx5/6* have reduced/transformed mandibles (Beverdam et al., 2002; Depew et al., 2002); (2) *hand2* mutant zebrafish and mice have reduced mandibles (Miller et al., 2003; Yanagisawa et al., 2003); and (3) zebrafish deficient in *dlx3b/4b/5a* (Talbot et al., 2010), as well as *nkx3.2* (Miller et al., 2003), have fused jaw joints. Edn1 signaling also restricts the Notch ligand, *Jag1b*, dorsally, suggesting that the two signals act in opposition to subdivide DV domains within the arches (Zuniga et al., 2010). Edn1 may act as a morphogen, activating ventral and intermediate genes at different concentrations (Kimmel et al., 2003; Kimmel et al., 2007). However, uniform application of Edn1 protein, as well as loss of *jag1b* function, can restore many aspects of DV patterning in zebrafish *edn1*<sup>-/-</sup> mutants (Miller et al., 2000; Zuniga et al., 2010). This suggests that the spatial localization of Edn1 is not crucial and that other ventralizing signals must interact with Edn1 to control DV patterning (Clouthier et al., 2010).

Bone morphogenetic proteins (BMPs) are likely to be one such instructive signal in DV patterning. In both zebrafish and mice, ventral arch ectoderm expresses *Bmp4* (Aberg et al., 1997; Vainio et al., 1993; Martinez-Barbera et al., 1997), cranial NC expresses *Bmp2* (Nie et al., 2006), and the pharyngeal endoderm/ectoderm

<sup>1</sup>Department of Developmental and Cell Biology, University of California, Irvine, CA 92697, USA. <sup>2</sup>Eli and Edythe Broad Institute for Regenerative Medicine and Stem Cell Research, Department of Cell and Neurobiology, University of Southern California, Los Angeles, CA 90033, USA.

\*Present address: Applied Biological Science, Faculty of Science and Technology, Tokyo, University of Science, Noda, Chiba, 278-8510, Japan

†Author for correspondence (tschilli@uci.edu)

expresses *bmp5* and *bmp7a/b* (Holzschuh et al., 2005). Like *Edn1*, BMPs induce transcription factors such as *Msx1* ventrally (Tucker et al., 1998a) and restrict expression of *Nkx3.2* dorsally to specify the jaw joint (Wilson and Tucker, 2004). *Bmp4* also restricts *Fgf8* and *Barx1* expression dorsally in the oral epithelium and mesenchyme, respectively, to determine tooth type, which restricts incisors ventrally and molars dorsally (Tucker et al., 1998b; Tucker et al., 1999). Conditional removal of *Bmp4* in the arch ectoderm and ventral endoderm (Liu et al., 2005), as well as removal of *Alk2* (a type 1 BMP receptor) in NC cells (Dudas et al., 2004), disrupts formation of the mandible. Conditional removal of *Smad4*, a key regulator of downstream BMP signaling, in cranial NC cells leads to the arrest of both incisors and molars in the mandibular arch (Ko et al., 2007).

Despite this body of evidence indicating requirements in craniofacial development, the precise roles of BMPs in DV patterning of the arches remain unclear. Other members of the Tgfb $\beta$  superfamily (e.g. Gdf and Nodal proteins) also influence craniofacial and skeletal development (Oka et al., 2007; Chai et al., 2003). BMP receptors phosphorylate Smads 1/5/8 (pSmad1/5/8), which bind in a complex with *Smad4* to a Smad-binding element in the promoter regions of BMP target genes. The typical method of detecting BMP signaling in developing animals, including zebrafish, relies on the detection of pSmad1/5/8 by immunostaining. Although useful, this approach is: (1) not a direct readout of transcriptional activation by BMPs; and (2) unsuitable for in vivo imaging as detection of phosphorylated Smad activity requires tissue fixation.

Here, we describe a new transgenic reporter line of zebrafish containing a BMP-response element driving GFP, *Tg(Bre:GFP)*, that specifically responds to endogenous BMP signaling activity and allows in vivo imaging of BMP signaling in developing zebrafish embryos. Using *Tg(Bre:GFP)* embryos, we show direct BMP responses in the ventral NC and surrounding epithelia of the pharyngeal arches. Using a dominant-negative BMP receptor transgenic, *Tg(hsp70l:dnBmpr1a-GFP)* (Pyati et al., 2005), we show that blocking BMP signaling soon after NC migration causes severe ventral (and intermediate) defects in the mandibular and hyoid arches, as well as disrupting the trabecular cartilages of the palate. Ventral expansion of *jag1b* expression in these BMP signaling-deficient embryos suggests a ventral-to-dorsal transformation. Conversely, overexpressing BMPs leads to specific transformations of dorsal and intermediate structures that are suggestive of a dorsal-to-ventral transformation. Initially, BMP induces *Edn1* and the two signals appear redundant in DV patterning. However, effects of *Edn1* later become restricted to the intermediate, joint-forming domain, whereas BMPs induce more ventral (mandible) and anterior (palate) domains, revealing a novel temporal component to patterning of the craniofacial skeleton.

## MATERIALS AND METHODS

### Generation of a *Bre:GFP* transgenic line

Our 21 bp BMP responsive element (*Bre*) contains core *Smad1*- and *Smad4*-binding elements derived from the promoter region of the *Xenopus Xvent2* gene, separated by a 5 bp nucleotide spacer (von Bubnoff et al., 2005; Yao et al., 2006). By testing single and multimerized versions of the *Bre*, we found a luciferase construct containing five tandem elements (5X-*Bre*) that is much more sensitive than a single element (data not shown). This 5X-*Bre* was placed upstream of a minimal *Xenopus Id3* promoter driving *GFP* (supplementary material Fig. S1). Three stable *Tg(Bre:GFP)* transgenic lines (p60, p69 and p77) were independently isolated and all showed similar expression patterns (supplementary material Fig. S1). We chose *Tg(Bre:GFP)<sup>p77</sup>* for further analysis because it showed the brightest GFP expression.

### mRNA and MO injections

xBmp4 and xNoggin (xNog) mRNAs were transcribed using mMessageMachine SP6 (Applied Biosystems) after linearization with *XhoI* and *EcoRI*, respectively. mRNA was diluted to 50–500 pg/nl in diethyl pyrocarbonate (DEPC)-treated water and 0.5 nl was pressure injected into single-cell zebrafish embryos. Embryos were fixed with 4% paraformaldehyde (PFA) at 6 hours post-fertilization (hpf) for immunostaining with anti-GFP (Abcam) and anti-pSmad1/5/8 (Millipore).

### Heat shock conditions

Zebrafish embryos obtained from *Tg(hsp70l:dnBmpr1a-GFP)<sup>w30</sup>* (Pyati et al., 2005) heterozygous adult incrosses were heated for 1 hour at 39°C in a PCR machine and subsequently raised in a 28.5°C incubator. After heat shock, GFP+ fluorescing embryos were sorted from GFP<sup>-</sup>, nonfluorescent siblings and either fixed for in situ hybridization and immunostaining 1–2 hours later or raised to 4–5 days post fertilization (dpf) for Alcian staining of cartilage (Walker and Kimmel, 2007). For *Tg(hsp70l:Gal4; UAS:Bmp4)* and *Tg(hsp70l:Gal4; UAS:Edn1)* activations, embryos were placed in a programmable incubator at 40°C for 4–8 hours, as indicated, and then returned to 28.5°C. For shorter *Tg(hsp70l:Gal4; UAS:Bmp4)* treatments, embryos were placed in 40°C pre-warmed embryo medium (EM) at 21 hpf and transferred to 28.5°C EM after 3 minutes.

### Bead implantation

Affi-gel blue beads (Bio-Rad) were incubated in a solution of human recombinant BMP4 homodimer (R&D Systems), BMP4/7 heterodimer (R&D Systems), NOGGIN (R&D Systems) or EDN1 (Sigma), or bovine serum albumin (BSA) diluted in phosphate-buffered saline (PBS) overnight at 4°C and just prior to implantation placed at 37°C for 1 hour. Zebrafish embryos at 22–24 hpf were mounted in 3–4% methylcellulose and a small slit was made with a tungsten needle directly behind the eye above the presumptive first pharyngeal arch. A protein-coated bead was inserted into the slit using the flat edge of the tungsten needle. Embryos were transferred to embryo medium for recovery and fixed in 4% PFA either at stages of DV patterning (28–36 hpf) for in situ hybridization or at larval stages (4–5 dpf) for cartilage staining.

### Protein injection

Zebrafish embryos at 22–24 hpf were mounted in 1% low melt agarose and a 0.5 nl droplet of a 1.0 mg/ml solution of human EDN1 protein (Sigma-Aldrich), diluted in water, was pressure injected through a glass microelectrode into the arch primordium. Embryos were either fixed in 4% PFA for in situ hybridization (20–36 hpf) or allowed to develop to 4–5 dpf for cartilage staining.

### Phenotypic analysis

Zebrafish embryos (4–5 dpf) were stained overnight using an acid-free Alcian Blue solution (Walker and Kimmel, 2007). Embryos were then rehydrated into PBS, bleached in 1% KOH/3% H<sub>2</sub>O<sub>2</sub>, cleared in 0.05% trypsin and stored in 70% glycerol. Cartilage was dissected and flat mounted as previously described (Javidan and Schilling, 2004). Colorimetric (Thisse et al., 1993) or two-color fluorescent (Zuniga et al., 2010) in situ hybridizations were performed. An antisense probe for *GFP* mRNA to detect *Tg(Bre:GFP)* expression was synthesized using T3 polymerase after linearization with *HindIII*. Other antisense probes included *dlx2a* (Akimenko et al., 1994), *dlx6a*, *dlx5a* and *dlx3b* (Akimenko et al., 1994), *hand2* (Yelon et al., 2000), *mxse* (Miller et al., 2003), *nkx3.2* (Miller et al., 2003), and *jag1b* (Zuniga et al., 2010). Immunolabeling was performed with anti-GFP and anti-pSmad1/5/8 antibodies, and detected using 1:500 DyLight 488 donkey anti-chick (Jackson ImmunoResearch) and 1:200 Alexa Fluor 564 goat anti-rabbit (Invitrogen). Embryos were fixed with 4% PFA and processed as previously described (Westerfield, 2000).

## RESULTS

### A BMP-responsive reporter reveals direct responses in the ventral pharyngeal arches

Loss-of-function mutations in *Bmp7* and *Bmpr1* in mice, as well as conditional deletions of *Bmp4* in arch epithelia or *Smad4* within the cranial neural crest (NC), cause craniofacial defects, including

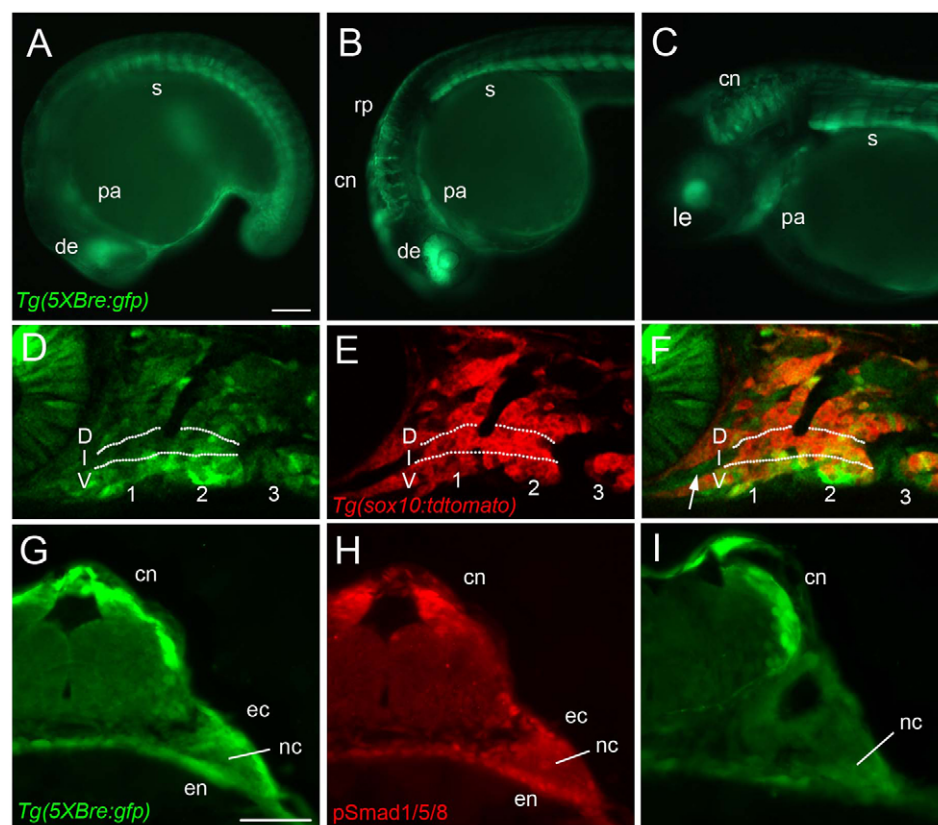

**Fig. 1. Expression of *Tg(Bre:GFP)* in the pharyngeal arches.** (A–C) GFP fluorescence in living *Tg(Bre:GFP)* transgenic embryos, lateral views, anterior towards the left. (D–F) Lateral views of the arches at higher magnification. Confocal slices of *Tg(Bre:GFP)* (D) and *Tg(sox10:lyn-tdTomato)* (E) double transgenics. The two channels are merged in F, demonstrating direct BMP responses in NC and in the stomodeum (arrow). (G–I) Adjacent transverse sections through the hindbrain and arches stained with anti-GFP (G,I) and anti-pSmad1/5/8 (H), revealing BMP responses in the NC and in surrounding endoderm (en) and ectoderm (ec). (A) 16 hpf. (B) 24 hpf. (C) 48 hpf. (D–F) 28 hpf. (G–I) 30 hpf. cn, commissural neurons; D, dorsal; de, dorsal eye; ec, ectoderm; en, endoderm; I, intermediate; le, lens; nc, neural crest; pa, pharyngeal arches; rp, roofplate; s, somites; V, ventral. Scale bars: 100 μm.

reduced mandibles and/or cleft lips/palates (Dudas et al., 2004; Liu et al., 2005; Ko et al., 2007). Because the mandible and portions of the palate develop from the mandibular arch (pharyngeal arch 1) during embryogenesis, we hypothesized that NC cells in this arch respond directly to BMPs. Previous analysis using a BMP response element (*Bre*) driving GFP (*Bre:GFP*) expression in *Xenopus laevis* embryos detected BMP responses in the pharyngeal region (von Bubnoff et al., 2005). We took advantage of this construct to develop a new zebrafish reporter line, *Tg(Bre:GFP)*, that marks BMP signaling activity (Fig. 1). In zebrafish embryos, *Tg(Bre:GFP)* was first detected on the ventral side of the gastrula at 6 hpf, and during segmentation (14–24 hpf) marked the dorsal eye, roof plate of the presumptive mid/hindbrain and somites (supplementary material Fig. S1), all regions with known functional roles for BMP signaling. *Tg(Bre:GFP)* expression was also: (1) correlated with immunostaining for pSmad1/5/8; (2) induced by the addition of exogenous Bmp4 mRNA or human recombinant BMP4/7 protein; and (3) reduced by BMP signaling inhibitors, such as Noggin (Nog), indicating that our reporter is both specific and sensitive (supplementary material Fig. S2). By 16 hpf, GFP expression was detected in the pharyngeal arches (Fig. 1A) and this persisted throughout embryogenesis and into larval stages (Fig. 1B,C; supplementary material Fig. S1), when expression increased in pharyngeal muscles. Thus, our reporter confirmed direct BMP signaling in the pharyngeal arches throughout embryonic arch morphogenesis and differentiation.

To determine which NC cells within the arches respond directly, we created double transgenics for the *Tg(Bre:GFP)* and *Tg(sox10:lyn-tdTomato)*, which marks migrating cranial NC cells (Fig. 1D–F). Confocal microscopy revealed co-expression of the two transgenes throughout arch NC at 28 hpf, with the strongest expression in ventral domains of arches 1 and 2 (Fig. 1D,F).

Optical sections through the arches also revealed strong *Tg(Bre:GFP)* expression in arch epithelia, including the stomodeum and endoderm (Fig. 1F). To confirm this, we compared *Tg(Bre:GFP)* expression (detected with an anti-GFP antibody) with pSmad1/5/8 immunostaining. In transverse sections at 30 hpf, both *Tg(Bre:GFP)* and pSmad1/5/8 were detected in arch epithelia (endoderm and ectoderm), as well as in NC cells throughout the arches (Fig. 1G–I). These results suggest that BMPs signal directly to NC cells throughout the mandibular and hyoid arches, as well as to surrounding arch epithelia, and that the strongest response is localized ventrally during the establishment of DV skeletal patterning.

### BMP signaling is required after NC migration for lower jaw and palate development

BMP signaling is implicated in NC induction, migration, proliferation and survival, as well as patterning and differentiation of the facial skeleton and teeth (Christiansen et al., 2000; Knecht and Bronner-Fraser, 2002; Dudas et al., 2004; Liu et al., 2005). Previous conditional mutants in mice to remove BMP signaling in NC cells could not distinguish between requirements in premigratory versus postmigratory NC (Ko et al., 2007). To address this issue, we used a transgenic line of zebrafish that expresses a heat shock-inducible, dominant-negative type 1 BMP receptor 1a [*Tg(hsp70l:dnBmpr1a-GFP)*], hereafter referred to as *dnBmpr* (Pyati et al., 2005). Homozygous *dnBmpr* transgenics (identified by strong GFP expression), heated for 1 hour at 39°C, lost pSmad1/5/8 immunostaining in the arches by 2 hours post-heat shock and this loss was still apparent up to 6 hours post-heat shock (supplementary material Fig. S3) when compared with controls (GFP-negative siblings) heat shocked in a similar manner. Analyses of pharyngeal cartilage formation at larval stages were carried out



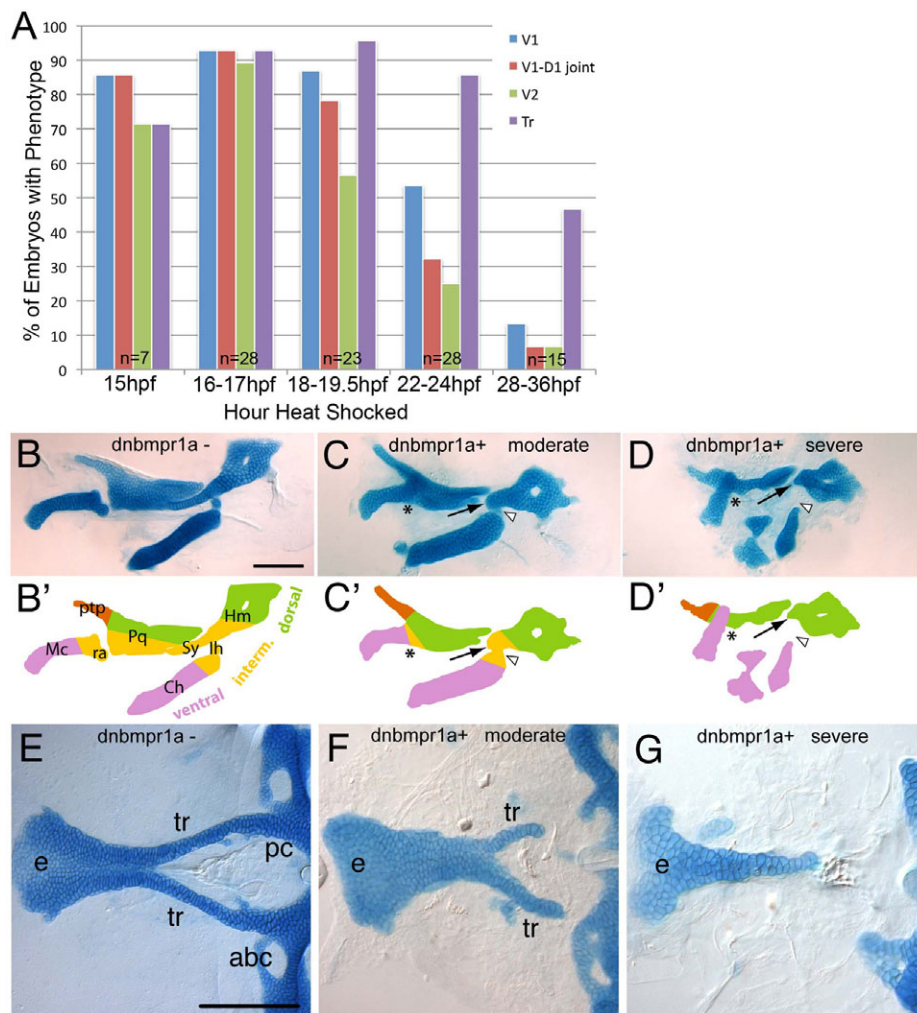

**Fig. 2. Requirements for BMP signaling in pharyngeal cartilage and palate development.** (A) Histogram quantifying the frequency of defects in different skeletal elements caused by heat shocking *Tg(hs:dnBmpr1-GFP)* embryos at different stages between 15 and 36 hpf. (B-G) Alcian Blue stained cartilages of 5 dpf larvae, dissected and flat-mounted, anterior towards the left. (B-D) Pharyngeal cartilages of control (B), moderate (C) and severely affected (D) *Tg(hs:dnBmpr1-GFP)* transgenics, heat shocked at 16-18 hpf, lateral views. (B'-D') Diagrams of cartilage elements in arch 1 (mandibular, Mc and Pq) and arch 2 (hyoid, Ch, Ih and Hm) corresponding to cartilages in B-D. Lateral views, anterior towards the left. Colors indicate dorsal (green), intermediate (yellow) and ventral (pink) elements. Arrows indicate dorsal arch 2 elements; asterisks indicate fused joints in arch 1; arrowheads indicate joints in arch 2. (E-G) Neurocranial cartilages of the palate, ventral view: control (E), moderate (F) and severe (G). abc, anterior basicranial commissure; Ch, ceratohyal; e, ethmoid plate; Hm, hyomandibular; Ih, interhyal; Mc, Meckel's cartilage; pc, parachordals; Pq, palatoquadrate; ptp, pterygoid process; ra, retroarticular process of Meckel's cartilage; Sy, symplectic; tr, trabeculae. Scale bars: 100  $\mu$ m.

after a careful time course of heat shocks between 12 and 36 hpf, thus revealing a *dnBmpr*-sensitive period between 15 and 22 hpf. Taking into account at least a 2-hour delay before complete loss of BMP signaling, this suggests a crucial period for BMP signaling in pharyngeal patterning from 17-24 hpf (Fig. 2A).

Homozygous *dnBmpr* embryos heat shocked between 16-18 hpf showed severe reductions of ventral cartilages and intermediate elements (e.g. joints) in both the mandibular (first) and hyoid (second) arches when compared with heat-shocked controls (Fig. 2B-D). Ventral mandibular (Meckel's cartilage, Mc) and hyoid (ceratohyal, Ch) elements were reduced in size or occasionally lost completely with high expressivity: 92% (mandibular) and 89% (hyoid) ( $n=28$ ). The first arch joint was frequently also fused (92%,  $n=28$ ) and the retroarticular process (ra, arch 1), symplectic (Sy, arch 2) and interhyal (Ih, arch 2), all intermediate domain derivatives, were consistently absent (Fig. 2D,D'). Dorsal elements were also affected in heat-shocked *dnBmpr* embryos. The hyomandibular (Hm, dorsal arch 2, arrows in Fig. 2C-D') retained its respective shape with the occasional reduction in size, as previously reported for *edn1*<sup>-/-</sup> and *hand2*<sup>-/-</sup> mutants (Miller et al., 2000; Miller et al., 2003), but the palatoquadrate (Pq, dorsal arch 1) was more severely affected, either reduced or more rod-like in shape. Consistent with a dose-dependent requirement for *Bmpr1a*, heterozygous *dnBmpr* transgenics (identifiable by their weak GFP expression) heat shocked at the same stages showed mild

reductions in Mc and lacked the mandibular joint, but dorsal elements were well formed (Fig. 2C,C'). Heat-shocked embryos showed no gross reductions in arch NC, as assayed in *Tg(hsp70l:dnBmpr1a-GFP);Tg(sox10:lyn-tdTomato)* double transgenics and the number of cells undergoing apoptosis was similar in heat shocked and control embryos (supplementary material Fig. S4). Thus, BMP signaling is required between 16 and 24 hpf for patterning and/or differentiation of craniofacial cartilages, particularly the ventral and intermediate domain-derived cartilages of the first two arches.

Strikingly, 92% of *dnBmpr* embryos heat shocked at 16-18 hpf partially or completely lost the trabecular cartilages of the palate but retained a midline ethmoid plate, and defects were stronger in homozygotes than heterozygotes (Fig. 2E-G). This was intriguing because we had previously shown that these cartilages arise from separate populations of NC cells that have different migratory paths from their relatives in the pharyngeal arches (Wada et al., 2005). Ethmoid precursors migrate anteriorly between the eyes, whereas trabecular precursors migrate just posterior to eye and at 20-24 hpf reside just dorsal and anterior to the oral epithelium of the stomodeum. Both the stomodeum and the NC cells in this location express *Tg(Bre:GFP)* (see Fig. 1D,F). To determine whether reducing BMP signaling alters stomodeal development, we examined *pitx2ca* and *fgf8a* expression in heat-shocked *dnBmpr* embryos and found occasional reductions in *pitx2ca* and variable expansion of the

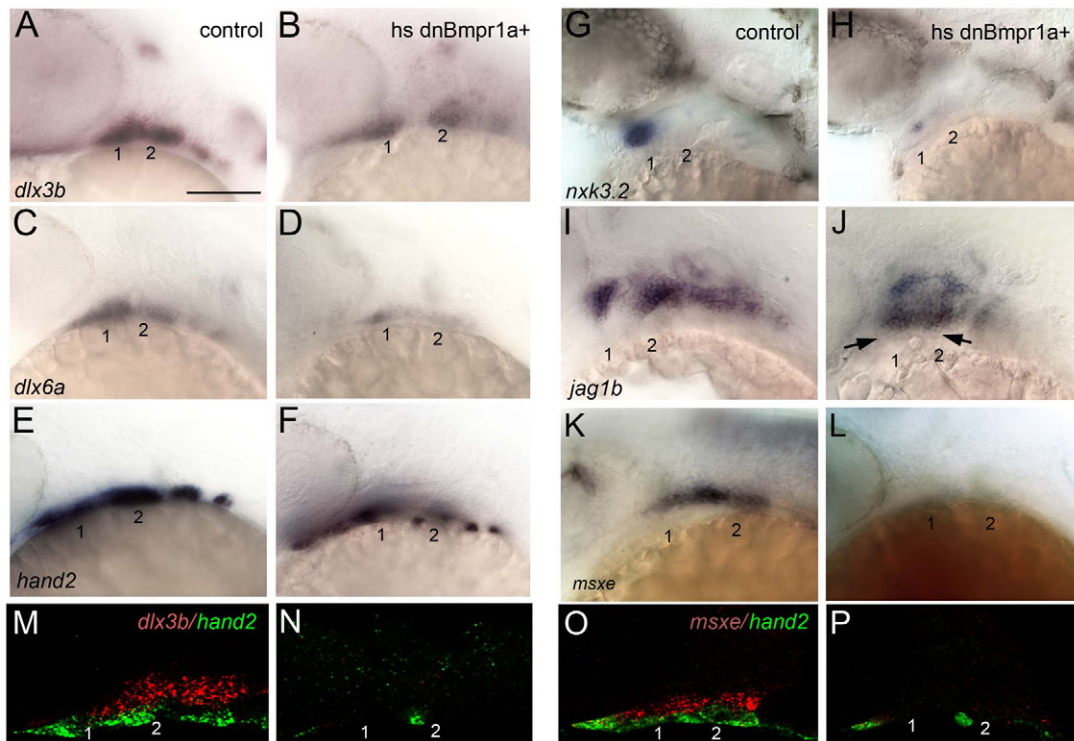

**Fig. 3. BMP signaling is required for ventral cell specification in the arches.** (A–P) Whole-mount in situ hybridization to detect expression of genes involved in DV arch patterning, lateral views, anterior towards the left in controls (A,C,E,G,I,K,M,O) and *Tg(hsp70l:dnBmpr1-GFP)* transgenics heat shocked at 16–18 hpf (B,D,F,H,J,L,N,P). *dlx3b* (A,B), *dlx6a* (C,D) and *hand2* (E,F) expression is reduced at 28 hpf. *nxk3.2* (G,H) expression is reduced and *jag1b* expression (I,J) expands ventrally at 36 hpf (arrows). *msxe* expression is lost at 30 hpf (K,L). Arches 1 and 2 are numbered. (M–P) Two-color fluorescent in situs to detect *dlx3b* (M,N, red) or *msxe* (O,P, red) simultaneously with *hand2* (green). Scale bar: 100 μm.

*fgf8a* expression domain (supplementary material Fig. S5) (Hu et al., 2003; Eberhart et al., 2006). These results suggest that, in addition to its roles in the lower jaw and jaw joint, BMP signaling also induces trabecular/palate formation and controls expression of early developmental regulatory genes in the oral ectoderm.

### BMP signaling is required to promote ventral and repress dorsal arch identities

Skeletal defects in BMP signaling-deficient embryos are reminiscent of mutants in both fish and mice that disrupt DV patterning of the arches (e.g. *Edn1*<sup>−/−</sup>, *EdnrA*<sup>−/−</sup> and *Dlx5*<sup>−/−</sup>; *Dlx6*<sup>−/−</sup>) (Miller et al., 2000; Depew et al., 2002; Beverdam et al., 2003; Ozeki et al., 2004; Nair et al., 2007) and several models have been proposed in which BMPs promote ventral (distal) arch identities. To investigate this model in more detail, we examined changes in expression patterns of genes required for establishing different DV domains within the arches. *dnBmpr* transgenic embryos were analyzed at 30 hpf after heat shocking at 16 hpf (Fig. 3). *dlx2a* is expressed throughout the DV axis of the arches and its expression was not disrupted in heat-shocked *dnBmpr* embryos (supplementary material Fig. S6). By contrast, *dlx3b* and *dlx6a* expression are intermediate along the DV axis, with *dlx3b* expression nested within the *dlx6a* expression domain (Talbot et al., 2010), and both were reduced in heat shocked *dnBmpr* transgenics (*dlx3b*: 66%, *n*=12/18; *dlx6a*: 69%, *n*=27/39) (Fig. 3A–D,M,N; supplementary material Fig. S6A,B). Within this intermediate domain, *nxk3.2* expression in joint progenitors within the mandibular arch was also severely reduced in these embryos (Fig. 3G,H; supplementary material Fig. S6C,D), as was expression

of *msxe* in a more ventral-intermediate domain (80%, *n*=8/10) (Fig. 3K,L). Expression of *hand2* in the ventral-most arch was also severely reduced (88%, *n*=32/36), with the remaining expression largely confined to epithelia at arch borders (Fig. 3E,F,M–P), similar to *edn1*<sup>−/−</sup> mutants. Based on these findings, we conclude that BMP signaling is required for specifying ventral and intermediate domains within the arches by regulating the expression domains of these transcription factors.

*jag1b* is a Notch ligand required for dorsal arch identities, and its mRNA is normally restricted to a dorsal-posterior domain within each arch. Importantly, *jag1b* expression was expanded ventrally throughout much of the intermediate and ventral domains in heat-shocked *dnBmpr* transgenics (100%, *n*=5/5) (Fig. 3I,J). These results suggest that loss of BMP signaling during arch development leads to a loss of ventralizing signals, and expansion of dorsalizing signals, resulting in partial transformations of ventral/intermediate domains to a more dorsal identity (see below).

### BMPs are sufficient to induce ventral arch identities

In a complementary gain-of-function approach, we tested the effects on skeletal development and DV patterning of increasing BMP signaling locally within the first arch at 22–24 hpf. Beads soaked in human recombinant BMP4 protein or BMP4/7 heterodimers (chosen because of their conserved expression in the arches across species) were implanted just behind the eye and the embryos raised for cartilage analysis 3 days later. Although BSA-soaked control beads had no effect on cartilage differentiation or arch morphology (Fig. 4A,C), beads soaked in human



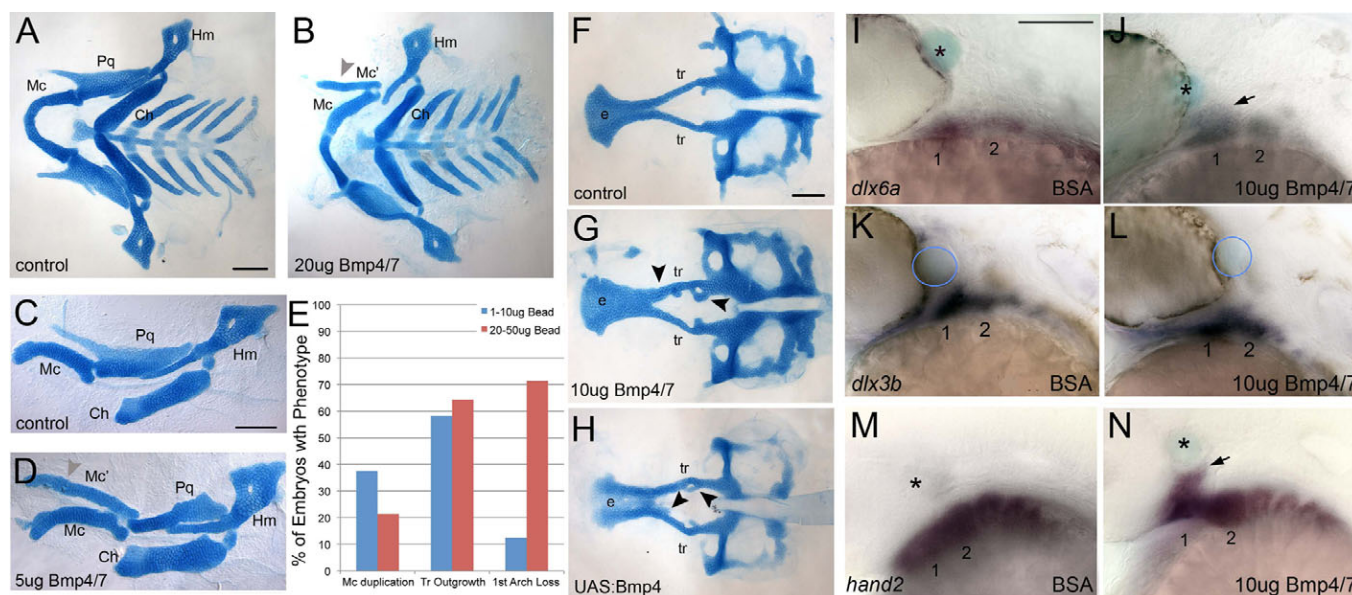

**Fig. 4. Exogenous BMP is sufficient to induce ventral arch identity.** (A-D,F-H) Alcian Blue-stained cartilages of 4-5 dpf larvae, dissected and flat-mounted, anterior towards the left. (I-N) Whole-mount in situ hybridization at 30 hpf, lateral views, anterior towards the left. (A,B) Pharyngeal cartilages of a control (A) and an embryo implanted behind the eye at 20 hpf with a bead soaked in 20  $\mu\text{g}/\mu\text{l}$  of human recombinant BMP4/7 heterodimers (B). (C,D) Isolated cartilages of the mandibular (1) and hyoid (2) arches: control (C); BMP4/7 bead-implanted (D). Grey arrowheads in B,D indicate duplicated Mc cartilages. (E) Histogram of phenotype frequency in bead-implanted embryos depending on BMP4/7 concentration. (F-H) Neurocranial cartilages: control (F); BMP4/7 bead-implanted (G); heat-shocked *Tg(hsp70l:Gal4;UAS:Bmp4)* (H). Black arrowheads indicate ectopic cartilages. (I,J) *dlx6a* expression slightly expands dorsally (arrow) in response to a BMP4/7-soaked bead (J). (K,L) *dlx3b* expression does not change when BMP4/7-soaked beads are implanted. (M,N) *hand2* expression also expands dorsally (arrow) in response to BMP4/7 protein. Asterisks and blue circles indicate beads. 1, mandibular arch; 2, hyoid arch; Ch, ceratohyal; e, ethmoid plate; Hm, hyomandibular; Mc, Meckel's cartilage; Mc', ectopic Meckel's cartilage; Pq, palatoquadrate; tr, trabeculae. Scale bars: 100  $\mu\text{m}$ .

recombinant BMP4 homodimers (10–25  $\mu\text{g}/\mu\text{l}$ ) or BMP4/7 heterodimers (which were more potent: 1–10  $\mu\text{g}/\mu\text{l}$ ) induced rod-shaped cartilage elements that resembled Mc (Fig. 4B,D). This was more common at lower concentrations and was typically located dorsal to Mc, in the position of the normal pterygoid process (Ptp), and occasionally fused to the endogenous Mc (not shown). The dorsal Pq was also consistently reduced or absent and its ventral aspect occasionally acquired an Mc-like morphology in BMP-implanted embryos (Fig. 4B,D). Trabecular cartilages of the palate were also expanded or malformed in response to exogenous BMPs (Fig. 4G). Similar arch and trabecular malformations were obtained with global overexpression of *Bmp4* using the transgenic line *Tg(hsp70l:Gal4;UAS:Bmp4)* – generated by crossing a line containing *hsp70l* driving GAL4 expression (*hsp70l:Gal4*) and one containing *Bmp4* driven by the UAS promoter (*UAS:Bmp4*) heat shocked at 20–24 hpf. Based on the position and morphology of the rod-shaped cartilages we interpreted this as evidence of a partial DV transformation of the pterygoid process (and possibly the ventral aspect of Pq) to a more-ventral, Mc-like morphology in the first arch. These results support the hypothesis that BMPs are sufficient to promote ventral arch development at the expense of dorsal arch development and to pattern the palate.

To determine whether these effects of exogenous BMPs on the skeleton reflect earlier changes in DV patterning we examined gene expression at 30 hpf in embryos implanted with human recombinant BMP4/7-soaked beads. Expression of *dlx6a* in its intermediate domain was slightly expanded dorsally in the first arch in response to beads soaked in 10  $\mu\text{g}$  BMP4/7 when compared

with BSA controls (Fig. 4I,J; 100%,  $n=6$ ) whereas expression of *dlx3b* appeared unaffected (Fig. 4K,L; 100%,  $n=6$ ). By contrast, *hand2* expression, which is normally restricted to the ventral domain, was strongly induced throughout the first arch in response to exogenous BMP4/7 (Fig. 4M,N; 60%,  $n=5$ ). Similar results were obtained in heat-shocked *Tg(hsp70l:Gal4;UAS:Bmp4)* embryos (Zuniga et al., 2011). Taken together with the loss-of-function data, these results suggest that *hand2* is particularly sensitive to BMP signaling in the ventral arches, whereas expression of *dlx6a* and other intermediate-domain genes appears less sensitive.

### Stage-specific interactions between BMP and Edn1 signaling in arch patterning

Edn1 signaling is required for ventral arch development and expression of *hand2*, *dlx3b*, *dlx6a* and *nkx3.2*, but recent models suggest that additional signals must work together with Edn1 to establish DV pattern (Clouthier et al., 2010). To determine whether BMP and Edn1 signals interact genetically in arch development, we injected 2.5 ng of an *edn1* morpholino (*edn1*-MO) into *dnBmpr* transgenics, heat shocked them and assayed cartilage morphology (supplementary material Fig. S7). Either *edn1*-MO or heterozygous *dnBmpr*<sup>+/-</sup> transgenics alone caused reductions in ventral cartilages and mandibular joint fusions. By contrast, ventral elements were completely absent in 66% ( $n=9$ ) of double mutants/morphants. These results suggest that BMP and Edn1 signaling synergize to promote ventral arch development.

We next examined epistatic relationships between Edn1 and BMP signaling. *edn1* expression was severely reduced or lost in *dnBmpr* embryos heat shocked from 16–18 hpf (Fig. 5B), and

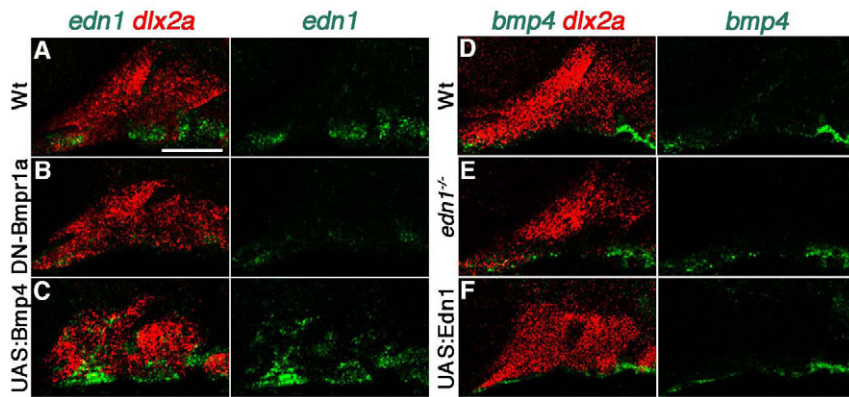

**Fig. 5. BMPs regulate Edn1 expression.**

Projections of double fluorescent in situ hybridization, lateral views, anterior towards the left. (A-C) *dlx2a* (red) and *edn1* (green) in wild-type (A), heat shocked *Tg(hsp70l:dnBmpr1a-GFP)* (B) and heat shocked *Tg(hsp70l:Gal4;UAS:Bmp4)* (C) embryos. (D-F) *dlx2a* (red) and *bmp4* (green) in wild-type (D), *edn1*<sup>-/-</sup> mutant (E) and heat shocked *Tg(hsp70l:Gal4;UAS:Edn1)* (F) embryos. Scale bar: 50 μm.

expanded dorsally in *Tg(hsp70l:Gal4;UAS:Bmp4)* embryos heat shocked at 20–24 hpf (Fig. 5C). By contrast, we detected no change in *bmp4* expression in *edn1*<sup>-/-</sup> mutants compared with wild type (Fig. 5D,E) (Miller et al., 2000), or in embryos overexpressing Edn1 using *Tg(hsp70l:Gal4;UAS:Edn1)* double transgenics heat shocked at 20–24 hpf. These results suggest that BMPs act, at least in part, upstream of *edn1* in DV arch patterning.

To address this further, we attempted to rescue deficiencies in BMP signaling by overexpressing Edn1, and vice versa. Microinjection of human recombinant EDN1 protein into the extracellular space of the arch mesenchyme rescued arch development in heat-shocked *dnBmpr* transgenics in a dose-dependent manner (Miller et al., 2000; Kimmel et al., 2007). Injection of 0.5 μg EDN1 protein over a time series from 24–31 hpf (8–15 hours post-heat shock at 16 hpf) partially restored Mc and Ch cartilages and the mandibular joint (Fig. 6A–D), but did not restore development of more dorsal arch cartilages or the trabecular cartilages of the palate (Fig. 6F–H). Injection of EDN1 after 31 hpf failed to rescue the phenotype (Fig. 6E), suggesting there is a window from 24–31 hpf during which EDN1 is sufficient to pattern ventral and intermediate cartilages. Rescue of Mc was less frequent whereas rescue of Ch in arch 2 was typically the most robust.

Similarly, overexpression of *Bmp4* by heat shocking *Tg(hsp70l:Gal4;UAS:Bmp4)* double transgenics at 20 hpf rescued ventral arch development in *edn1*<sup>-/-</sup> mutants (Fig. 6I–K). However, rescue was restricted to ventral cartilages and joints remained fused. In addition, rescue occurred only with short heat shocks (1–3 minutes), and higher amounts of BMP, either with longer heat shocks or implantation of human recombinant BMP4/7-soaked beads at 22–24 hpf, failed to rescue the skeleton (data not shown; 3/3) or the expression of *dlx5b* (supplementary material Fig. S8). These results suggest that BMPs can promote ventral skeletal fates in the arches in an Edn1-independent manner.

To investigate this further, we examined the ability of Edn1 to rescue gene expression in ventral and intermediate domains of the arches in BMP-deficient embryos. Injections of EDN1 protein restored *dlx5a* (44%, *n*=9) and *dlx6* (83%, *n*=6), and *msxe* (66%, *n*=15) to their normal patterns of expression (Fig. 7G–O) and strongly induced *dlx3b* (50%, *n*=8) throughout much of the DV extent of the first and second arches (Fig. 7D–F). Surprisingly, however, restoring Edn1 expression failed to rescue *hand2* expression (0%, *n*=16) or to completely rescue Mc cartilage to its normal size. This suggests that Edn1 can promote intermediate domain *Dlx* gene expression and ventral arch skeletal fates in a BMP-independent manner but requires BMP to induce *hand2*.

As *Hand2* expression requires Edn1, we hypothesized that induction occurs at an earlier stage and becomes BMP-dependent after 24 hpf. In zebrafish, efficient ventralization with EDN1 protein injections only occurs within a narrow time window around 24 hpf (Miller et al., 2000; Kimmel et al., 2007). Thus, we injected 0.5 μg EDN1 protein at several timepoints between 18 and 36 hpf in heat-shocked *dnBmpr* transgenics (heat shocked at 16 hpf). However, in all cases these failed to cause any detectable increase in the pattern or levels of *hand2* expression in the arches (data not shown), and this correlated with a failure to completely rescue Mc (see Fig. 6). Similarly, *Tg(hsp70l:Gal4;UAS:Edn1)* transgenics heat shocked between 16 and 28 hpf failed to rescue *hand2* expression in BMP-deficient embryos (Zuniga et al., 2011). These results confirm the *hand2* expression is BMP-dependent at both early and later stages of arch development.

## DISCUSSION

In this study, we show that BMPs act upstream and in parallel to Edn1 to promote ventral skeletal fates in the pharyngeal arches, with BMPs having an Edn1-independent role in palate development (Fig. 8). Initially, BMPs induce Edn1 expression ventrally and both signals repress *Jag1b* dorsally to induce ventral (lower jaw) and intermediate (joint) skeletal fates in the mandibular arch (Fig. 8A). Later, the roles of BMPs and Edn1 become spatially distinct, with BMPs inducing the ventral-most fates within the arch while Edn1 induces more intermediate fates (Fig. 8B; Zuniga et al., 2011). Our model helps reconcile the fact that BMPs and Edn1 are both required for ventral arch development. It is consistent with data showing that BMP and Edn1 signaling regulate some common targets, such as *Msx1*, and not others. It also helps explain why defects in either BMP or Edn1 alone fail to completely eliminate or transform the mandible, as they act together in a DV patterning network.

## Spatial and temporal specificity in BMP signaling during craniofacial development

Previous studies have shown that removing *Bmp4* in cranial epithelia (or *Smad4* in NC cells) in mice causes lower jaw defects (Liu et al., 2005; Ko et al., 2007). However, BMPs have been implicated in NC induction, proliferation, survival and differentiation (Christiansen et al., 2000; Aybar and Mayor, 2002; Knecht and Bronner-Fraser, 2002), and problems with any of these might indirectly cause such DV defects. We provide evidence for a more direct role in patterning by: (1) defining a time window of BMP activity after NC migration; and (2) demonstrating that BMPs specify ventral and intermediate domains at the expense of dorsal. We first detect *Tg(Bre:GFP)*



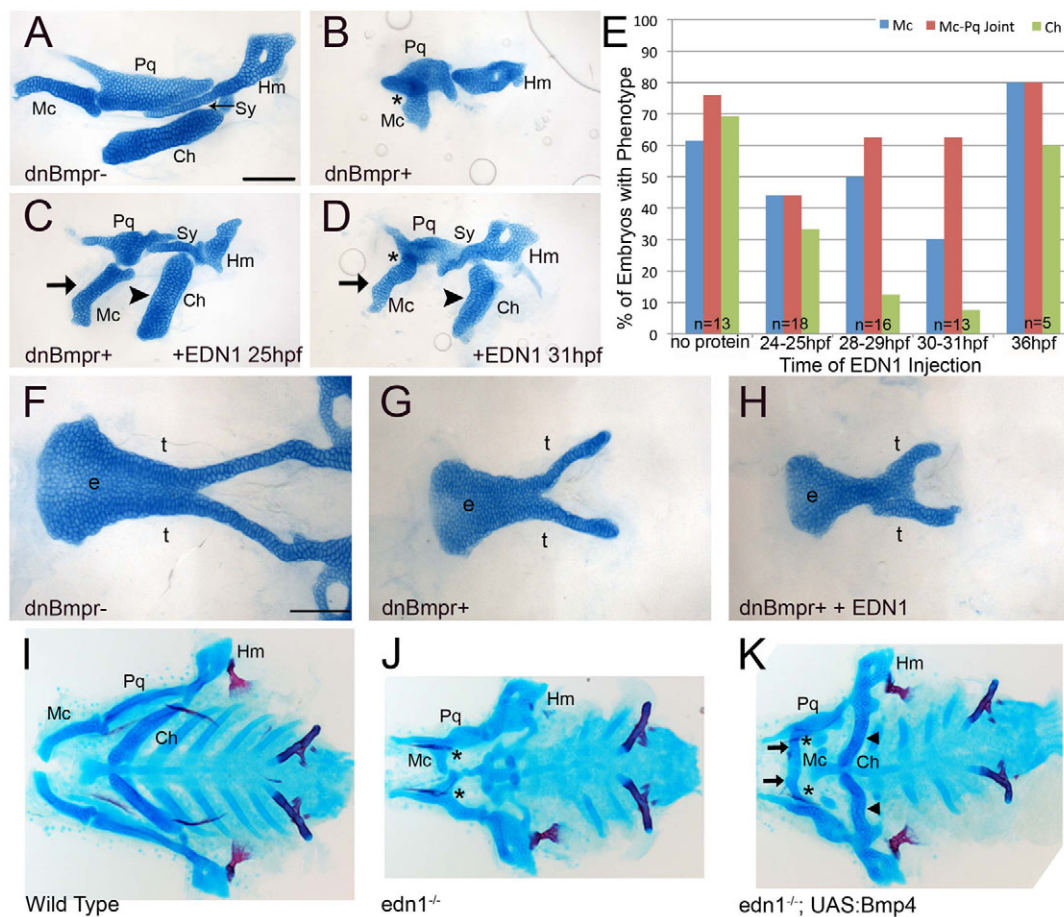

**Fig. 6. Exogenous Edn1 rescues BMP deficiency and vice versa.** (A-D) Alcian Blue stained cartilages of 5 dpf larvae, anterior towards the left. (A-D) Dissected cartilages, lateral views, of a control (A), *Tg(hsp70l:dnBmpr1a-GFP)* transgenic heat shocked at 16-18 hpf (B) and similarly treated transgenics in which 0.5  $\mu$ g human recombinant EDN1 protein was microinjected into the arches at 25 hpf (C) and 31 hpf (D). (E) Histogram depicting percentages of *Tg(hs:dnBmpr1a-GFP)*+ embryos with severe ventral arch defects without and with EDN1 protein injected. (F-H) Ventral view of neurocranial cartilage in control (F), *dnBmpr+* (G) and *dnBmpr+* with 0.5  $\mu$ g EDN1 injected (H). (I-K) Whole-mount cartilages, ventral views, of non-transgenic wild-type control (I), non-transgenic *edn1<sup>-/-</sup>* mutant (J) and *edn1<sup>-/-</sup>; Tg(hsp70l:Gal4;UAS:Bmp4)* (K) embryos subjected to a 1-minute heat shock at 21 hpf. Arrows show rescued ventral Mc; arrowheads show rescued ventral Ch cartilages; asterisks indicate fused Mc-Pq joints. Ch, ceratohyal; e, ethmoid plate; Hm, hyomandibular; Mc, Meckels cartilage; Pq, palatoquadrate; Sy, symplectic; t, trabeculae. Scale bars: 100  $\mu$ m.

expression (and Smad1/5/8 phosphorylation) in the mandibular arch in zebrafish at 16 hpf and prominently in arch NC cells by 24 hpf. By 28 hpf, *Tg(Bre:GFP)* expression reveals at least two distinct states within the arches, high BMP signaling in ventral domains and low signal in intermediate and dorsal domains, as opposed to a BMP signaling gradient. Consistent with this, heat-shocking *dnBmpr* transgenics between 16 and 18 hpf causes strong reductions in ventral cartilages, whereas BMP overexpression with human recombinant BMP4/7-soaked beads or *Tg(hsp70l:Gal4;UAS:Bmp4)* causes dorsal cartilages to acquire more ventral rod-like shapes. Based on their morphologies, we interpret these as dorsal-to-ventral transformations of Ptp (an anterior subset of the dorsal domain) (Talbot et al., 2010) and in some cases Pq (bead implantation in arch 1) or Hm (dorsal arch 2). These transformations correlate with changes in gene expression – loss of BMP signaling reduces ventral expression of *hand2* and *dlx3b*, and expands *jag1b* expression ventrally at 30 hpf (more than 24 hours prior to cartilage differentiation), without disrupting NC migration or survival, whereas BMP overexpression expands *hand2* expression into the

dorsal domain in both arches 1 and 2. Thus, BMP signaling promotes ventral identities in NC cells within the arches, and this may underlie the ability of Bmp4 to promote incisor formation in mandibular explants, and restrict *Nkx3.2* expression to position the jaw joint (Vainio et al., 1993; Thesleff and Sharpe, 1997; Tucker et al., 1998a).

Our results also suggest that BMPs act both directly on NC cells and indirectly through induction of other signals in the mandibular epithelium. *Tg(Bre:GFP)* is expressed in both the NC and the surrounding epithelia at 16-24 hpf. Mosaic analyses suggest that inhibiting Bmpr1a function in NC causes loss of *hand2* and *msxe* expression in a cell-autonomous manner (Zuniga et al., 2011). However, BMP deficiency also causes a loss of *edn1* and expansion of *fgf8a* expression in the oral ectoderm, similar to previous studies in mice (Stottmann et al., 2001), which would be predicted to alter skeletal morphogenesis. Loss of Smad4 in NC cells also leads to defects in *Fgf8* expression in the adjacent oral ectoderm in mice (Ko et al., 2007). Hence, our results are consistent with either direct effects of BMP signaling on the ectoderm or feedback interactions between NC and ectoderm.



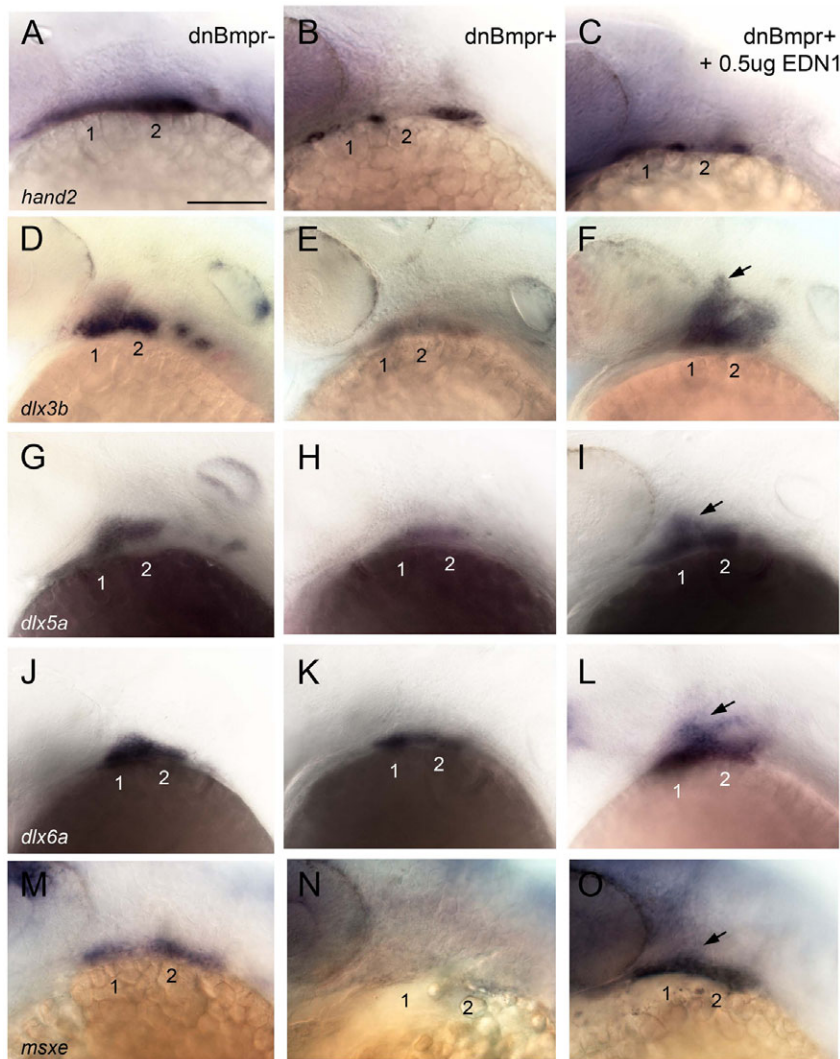

**Fig. 7. Edn1 rescues ventral patterning in BMP-deficient embryos.** (A-O) Whole-mount in situ hybridization to detect expression of genes involved in DV arch patterning at 30 hpf, lateral views, anterior towards the left in controls (A,D,G,J,M), *Tg(hsp70l:dnBmpr1a-GFP)* transgenics heat shocked at 16-18 hpf (B,E,H,K,N) and heat-shocked transgenics injected with human recombinant EDN1 protein (C,F,I,L,O). *hand2* (A-C) expression is unaffected, whereas *dlx5a* (G-I), *dlx6a* (J-L) and *msxe* (M-O) expression are restored by EDN1 protein in heat-shocked transgenics, and *dlx3b* (D-F) expression is induced throughout the DV extent of the arches. Arches 1 and 2 are numbered. Arrows indicate rescued gene expression. Scale bar: 100  $\mu$ m.

### An integrated Edn1 and BMP signaling network in DV patterning

BMP and Edn1 signaling initially play similar roles in promoting ventral (distal) skeletal fates in the mandible (Aberg et al., 1997; Liu et al., 2005; Clouthier et al., 2010). We argue that BMPs initially promote Edn1, as heat-shocked *dnBmpr* transgenics lose *edn1* expression, and restoring Edn1 partially rescues ventral fates and cartilage patterning in the absence of BMP (Fig. 8A). However, rescue occurs only during a brief early time window and clearly some later roles for BMP signaling are Edn1 independent. This is important, as there must be additional DV signals besides Edn1 to explain why injection of EDN1 protein in an unlocalized manner throughout the mandibular arch primordium rescues the lower jaw in *edn1*<sup>-/-</sup> mutants (Miller et al., 2000). As *bmp4* expression remains restricted ventrally in the absence of Edn1, this could provide the necessary ventralizing information to allow correct DV patterning.

This partial overlap in the ventralizing activities of BMP and Edn1 signaling probably reflects not only temporal differences in their inductive activities but also overlap in some transcriptional targets and not others. Both promote expression of *Msx1* (*msxe* in zebrafish), which is expressed in the ventral arches [*msxe* actually marks a distinct ventral-intermediate domain in zebrafish (Zuniga et al., 2011)] and is required for migration and survival of cranial

NC cells in mice (Ishii et al., 2005)]. However, the close relative and direct BMP target *Msx2* appears to be Edn1 independent (Ruest et al., 2004). Both BMP and Edn1 induce expression of ventrally expressed *Dlx* genes, including *Dlx5* and *Dlx6*, which, when deleted, cause ventral truncations and DV transformations of the mandible that are strikingly similar to loss of *Edn1* (Miller et al., 2000; Ozeki et al., 2004). However, by 24 hpf, *dlx3b* in the zebrafish becomes Edn1 dependent, but less sensitive to BMP.

One potential target of particular interest is *Hand2*, which has been reported to respond quite differently to BMPs and Edn1, and is crucial for establishing DV arch domains. Current models suggest that Edn1 acts at short range (two or three cells) to induce *Dlx5/6*, possibly through *Mef2c* (Miller et al., 2007), which in turn induce *Hand2* through its arch-specific enhancer (Charite et al., 2001). Human recombinant BMP4-soaked beads do not induce *Hand2* expression in the chick embryo (Wilson and Tucker, 2004) but *Hand2* expression is reduced when *Bmp4* is removed from arch epithelia in mice (Liu et al., 2005). Our results in zebrafish suggest that both BMPs and Edn1 are required for *hand2* expression in early arches (18-20 hpf), but BMPs are much more potent inducers of *hand2* just a few hours later. EDN1 overexpression also does not rescue *hand2* expression in the absence of BMP signaling despite being able to restore some ventral cartilage and joint formation.

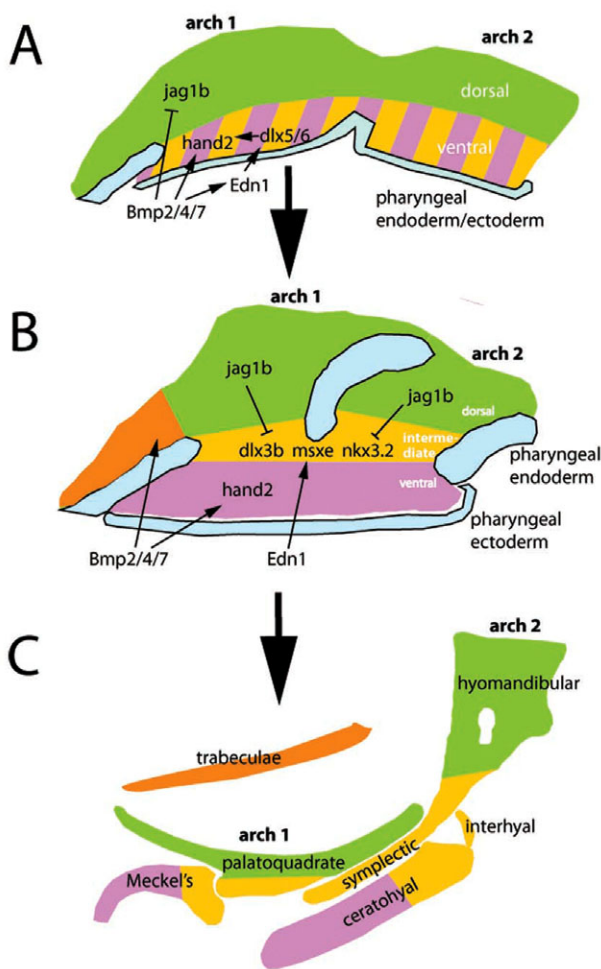

**Fig. 8. Model.** Schematic of the primordia of arches 1 and 2 at 20 hpf (A), 30 hpf (B) and cartilages at 6 dpf (C), lateral views, anterior towards the left. (A) Pharyngeal epithelia (blue) express Bmp2/4/7 and Edn1. Ventral/intermediate (pink/orange stripes) and dorsal (green) domains are indicated within the arch mesenchyme. BMPs induce Edn1, and both induce *hand2* expression ventrally and repress *jag1b* dorsally. (B) Ventral (pink), intermediate (light orange), dorsal (green) and anterior (dark orange) domains are indicated at 30 hpf. BMPs induce *hand2* expression as well as Edn1 expression, which in turn induces intermediate domain genes (arrows) but not *hand2* at this stage. BMP also promotes trabecular development from the anterior maxillary domain (dark orange). (C) Defects in BMP or Edn1 signaling lead to defects in the corresponding dorsal and ventral cartilages, joints and trabecular cartilages that derive from these different domains.

This apparent contradiction may reflect the fact that we cannot detect very low levels of rescued *hand2*, which are sufficient to restore ventral skeletal identities. Alternatively, or in parallel, BMPs may rescue other aspects of Edn1 deficiency, such as NC proliferation and survival in the ventral arches. BMPs may also help induce the subset of *Hand2*-expressing cells that remain in the ventral-most arch in the absence of Edn1/Ednra signaling, both in fish and mice (Ruest et al., 2004; Nair et al., 2007). Such results are also consistent with *Hand2* being induced by BMPs in other contexts, such as in precursors of sympathetic neurons and endodermal cells of the gut (Howard et al., 2000; Wu and Howard, 2002).

Another target gene that responds differently to BMPs and Edn1 depending on the context is *Nkx3.2*. While Bmp4 has been reported to inhibit *Nkx3.2* in the mesenchyme in chick to restrict it to the joint, we find that zebrafish *nkx3.2* expression is severely reduced in BMP-deficient zebrafish embryos. This is more consistent with the hypothesis that BMPs initially promote *Nkx3.2* expression as well as other intermediate-specific Dlx genes (Tucker et al., 1998a) and our results suggest that they may do so indirectly through Edn1. Later, *Hand2* represses intermediate-specific genes such as *dlx3b/4b/5a*, thereby restricting *nkx3.2* to the joint domain, and opposes dorsal signals such as *Jag1b*, thereby further refining domains along the DV axis (Zuniga et al., 2010). Such intermediate-specific defects are also consistent with previous studies of Ednra (Clouthier et al., 2000; Nair et al., 2007) and would help explain the distinct ventral and intermediate skeletal defects reported for *Bmp2*, *Bmp4* or *Edn1* mutants.

### A direct role for BMPs in palate development

One craniofacial structure that is more difficult to fit into this model of nested DV patterning domains induced by BMPs and Edn1 is the palate. Heat-shocked *dnBmpr* embryos lack the trabecular cartilages of the primary palate, while BMP overexpression leads to trabecular expansion/malformation. BMP-deficient mice often show palatal clefting. We and others have previously shown that the trabeculae in zebrafish arise from NC cells that lie within the maxillary region of the mandibular arch (Wada et al., 2005; Eberhart et al., 2006). At 24 hpf, these cells are located above the stomodeum and express *Tg(Bre:GFP)* (see Fig. 1). In addition, NC cells that form the Ptp process of the Pq cartilage also lie in this region. Although inhibition of BMP signaling in *dnBmpr* transgenics does not eliminate Ptp, BMP overexpression appears to transform this process into a Mc-like ventral element. Thus, BMPs may have conserved roles in patterning the maxillary region of the first arch as well as the palate. BMPs may act directly on these domains or through expansion of *fgf8a* expression and other signals within the stomodeum (an interesting issue to resolve in the future).

However, unlike DV patterning within the arches, we find no evidence for overlapping functions of BMPs and Edn1 signaling in trabecular development. Loss of Edn1 signaling has little effect on the palate and restoring Edn1 does not rescue trabecular development in BMP-deficient embryos. By contrast, in mice the palatine bone, which also derives from the maxillary domain, expands ventrally in mutants in the Edn1 signaling pathway (Miller et al., 2000; Dudas et al., 2004; Ozeki et al., 2004; Liu et al., 2005). In addition, when Edn1 is knocked into the Ednra locus in mice, it causes an apparent homeotic transformation of the maxilla into a mandible (Sato et al., 2008) and misexpression of Edn1 induces *dlx3b/dlx5a* in the maxillary domain in zebrafish (Zuniga et al., 2010). Thus, our results suggest that while maxillary/palate progenitors can respond to Edn1, they require BMPs in an Edn1-independent manner in this more anterior craniofacial domain.

### Evolution of the D-V pharyngeal patterning system

The collaboration between BMP and Edn1 that we describe here for the pharyngeal skeleton may be an ancient and common motif in vertebrates. Both signals are active and have been shown to interact in smooth muscle and vascular endothelial cells (Dorai et al., 2000; Bouallegue et al., 2007; Le Bras et al., 2010), NC cells that contribute to the heart outflow tract (Clouthier et al., 1998;



Yanagisawa et al., 1998a; Kaartinen et al., 2004), osteoblasts (Guise et al., 2003; Canalis et al., 2005), and some forms of prostate cancer (Dawson et al., 2006; Ye et al., 2007; Whyteside et al., 2010). In the future it will be interesting to determine whether or not a similar genetic hierarchy exists between BMP and Edn1, and whether they regulate similar targets in these different contexts.

The DV patterning system of BMP and Edn1 signaling we describe for the craniofacial skeleton also may have been pivotal in jaw evolution. Recent evidence suggests that three DV domains (ventral, intermediate and dorsal) arose before the divergence of jawed vertebrates from their jawless ancestors, as living agnathans (i.e. lampreys) show distinct DV-restricted domains of Dlx gene expression, presumably corresponding to mandibular, intermediate and maxillary domains (Neider et al., 2001). This is despite the absence of a jaw joint or focal expression of an *Nkx3.2* ortholog in the arches of these animals. Notably, however, *Hand2* expression is ventrally restricted in lamprey embryos (Kuraku et al., 2010). Based on our data, this may have first arisen when *Hand2* expression happened to fall under the control of an ancestral, ventrally localized BMP or Edn1 signal. Subsequent reinforcement of ventral-specific signaling through positive- and negative-feedback interactions between these two signals (as well as Notch signaling) could have led to a robust DV patterning system. In addition, divergence in target gene regulation by these two ventralizing signals, together with cross-inhibitory interactions between their targets may have further defined the intermediate domain to give rise to joints. In this way, a primitive DV patterning system in the chordate ancestors of vertebrates could be established that was later refined to allow formation of a lower jaw. Further refinement of this system may have been a crucial innovation in the evolution of a biting jaw in gnathostomes.

#### Acknowledgements

We thank Ines Gehring, Megan Matsutani and Corey Gingerich for fish care, Pam Lincoln and Patrick Hsieh for help with generating the *Tg(Bre:GFP)* line, and David Kimelman for the *Tg(hsp70l:dnBmpr1a-GFP)* line.

#### Funding

This research was supported by the National Institutes of Health [F31DE020248 to E.Z., R01HD056219 to K.W.C., R01DE018405 and R01DE018405-S03 to J.G.C., R01DE13828 to T.F.S.]; and March of Dimes [FY08-459 to J.G.C.]. Deposited in PMC for release after 12 months.

#### Competing interests statement

The authors declare no competing financial interests.

#### Supplementary material

Supplementary material available online at <http://dev.biologists.org/lookup/suppl/doi:10.1242/dev.067801/-DC1>

#### References

- Aberg, T., Wozney, J. and Thesleff, I. (1997). Expression patterns of bone morphogenetic proteins (Bmps) in the developing mouse tooth suggest roles in morphogenesis and cell differentiation. *Dev. Dyn.* **210**, 383-396.
- Akimenko, M. A., Ekker, M., Wegner, J., Lin, W. and Westerfield, M. (1994). Combinatorial expression of three zebrafish genes related to distal-less: part of a homeobox gene code for the head. *J. Neurosci.* **14**, 3475-3486.
- Aybar, M. J. and Mayor, R. (2002). Early induction of neural crest cells: lessons learned from frog, fish and chick. *Curr. Opin. Genet. Dev.* **12**, 452-458.
- Beverdam, A., Merlo, G. R., Paleari, L., Mantero, S., Genova, F., Barbieri, O., Janvier, P. and Levi, G. (2002). Jaw transformation with gain of symmetry after Dlx5/Dlx6 inactivation: mirror of the past? *Genesis* **34**, 221-227.
- Bouallegue, A., Daou, G. B. and Srivastava, A. K. (2007). Endothelin-1-induced signaling pathways in vascular smooth muscle cells. *Curr. Vasc. Pharmacol.* **5**, 45-52.
- Canalis, E., Derogowski, V., Pereira, R. C. and Gaggero, E. (2005). Signals that determine the fate of osteoblastic cells. *J. Endocrinol. Invest.* **28**, 3-7.
- Chai, Y., Ito, Y. and Han, J. (2003). TGF-beta signaling and its functional significance in regulating the fate of cranial neural crest cells. *Crit. Rev. Oral Biol. Med.* **14**, 78-88.
- Charite, J., McFadden, D. G., Merlo, G., Levi, G., Clouthier, D. E., Yanagisawa, M., Richardson, J. A. and Olson, E. N. (2001). Role of Dlx6 in regulation of an endothelin-1-dependent, dHAND branchial arch enhancer. *Genes Dev.* **15**, 3039-3049.
- Christiansen, J. H., Coles, E. G. and Wilkinson, D. G. (2000). Molecular control of neural crest formation, migration and differentiation. *Curr. Opin. Cell Biol.* **12**, 719-724.
- Clouthier, D. E., Hosoda, K., Richardson, J. A., Williams, S. C., Yanagisawa, H., Kuwaki, T., Kumada, M., Hammer, R. E. and Yanagisawa, M. (1998). Cranial and cardiac neural crest defects in endothelin-A receptor-deficient mice. *Development* **125**, 813-824.
- Clouthier, D. E., Williams, S. C., Yanagisawa, H., Wieduwilt, M., Richardson, J. A. and Yanagisawa, M. (2000). Signaling pathways crucial for craniofacial development revealed by endothelin-A receptor-deficient mice. *Dev. Biol.* **217**, 10-24.
- Clouthier, D. E., Garcia, E. and Schilling, T. F. (2010). Regulation of facial morphogenesis by endothelin signaling: Insights from mice and fish. *Am. J. Med. Genet. A* **152A**, 2962-2973.
- David, N. B., Saint-Etienne, L., Tsang, M., Schilling, T. F. and Rosa, F. M. (2002). Requirement for endoderm and FGF3 in ventral head skeleton formation. *Development* **129**, 4457-4468.
- Dawson, L. A., Maitland, N. J., Berry, P., Turner, A. J. and Usmani, B. A. (2006). Expression and localization of endothelin-converting enzyme-1 in human prostate cancer. *Exp. Biol. Med.* **231**, 1106-1110.
- Depew, M. J., Lufkin, T., Rubenstein, J. L. (2002). Specification of jaw subdivisions by Dlx genes. *Science* **298**, 381-385.
- Dorai, H., Vukicevic, S. and Sampath, T. K. (2000). Bone morphogenetic protein-7 (osteogenic protein-1) inhibits smooth muscle cell proliferation and stimulates the expression of markers that are characteristic of SMC phenotype in vitro. *J. Cell. Physiol.* **184**, 37-45.
- Dudas, M., Sridurongrit, S., Nagy, A., Okazaki, K. and Kaartinen, V. (2004). Craniofacial defects in mice lacking BMP type I receptor Alk2 in neural crest cells. *Mech. Dev.* **121**, 173-182.
- Eberhart, J. K., Swartz, M. E., Crump, J. G. and Kimmel, C. B. (2006). Early Hedgehog signaling from neural to oral epithelium organizes anterior craniofacial development. *Development* **133**, 1069-1077.
- Guise, T. A., Yin, J. J. and Mohammad, K. S. (2003). Role of endothelin-1 in osteoblastic bone metastases. *Cancer* **97**, 779-784.
- Holzschuh, J., Wada, N., Wada, C., Schaffer, A., Javidan, Y., Tallafuss, A., Bally-Cuif, L. and Schilling, T. F. (2005). Requirements for endoderm and BMP signaling in sensory neurogenesis in zebrafish. *Development* **132**, 3731-3742.
- Howard, M. J., Stanke, M., Schneider, C., Wu, X. and Rohrer, H. (2000). The transcription factor dHAND is a downstream effector of BMPs in sympathetic neuron specification. *Development* **127**, 4073-4081.
- Hu, D., Marcucio, R. S. and Helms, J. A. (2003). A zone of frontonasal ectoderm regulates patterning and growth in the face. *Development* **130**, 1749-1758.
- Ishii, M., Han, J., Yen, H. Y., Sucov, H. M., Chai, Y. and Maxson, R. E., Jr (2005). Combined deficiencies of Msx1 and Msx2 cause impaired patterning and survival of the cranial neural crest. *Development* **132**, 4937-4950.
- Javidan, Y. and Schilling, T. F. (2004). Development of cartilage and bone. *Methods Cell Biol.* **76**, 415-436.
- Kaartinen, V., Dudas, M., Nagy, A., Sridurongrit, S., Lu, M. M. and Epstein, J. A. (2004). Cardiac outflow tract defects in mice lacking ALK2 in neural crest cells. *Development* **131**, 3481-3490.
- Kimmel, C. B., Ullmann, B., Walker, M., Miller, C. T. and Crump, J. G. (2003). Endothelin-1 mediated regulation of pharyngeal bone development. *Development* **130**, 1339-1351.
- Kimmel, C. B., Walker, M. B. and Miller, C. T. (2007). Morphing the hyomandibular skeleton in development and evolution. *J. Exp. Zool. B Mol. Dev. Evol.* **308**, 609-624.
- Knecht, A. K. and Bronner-Fraser, M. (2002). Induction of the neural crest: a multigene process. *Nat. Rev. Genet.* **3**, 453-461.
- Knight, R. D. and Schilling, T. F. (2006). Cranial neural crest and development of the head skeleton. *Adv. Exp. Med. Biol.* **589**, 120-133.
- Ko, S. O., Chung, I. H., Xu, X., Oka, S., Zhao, H., Cho, E. S., Deng, C. and Chai, Y. (2007). Smad4 is required to regulate the fate of cranial neural crest cells. *Dev. Biol.* **312**, 435-447.
- Kuraku, S., Takio, Y., Sugahara, F., Takechi, M. and Kuratani, S. (2010). Evolution of oropharyngeal patterning mechanisms involving Dlx and endothelins in vertebrates. *Dev. Biol.* **341**, 315-323.
- Le Bras, A., Vijayaraj, P. and Oettgen, P. (2010). Molecular mechanisms of endothelial differentiation. *Vasc. Med.* **15**, 321-331.
- Liu, W., Sun, X., Braut, A., Mishina, Y., Behringer, R. R., Mina, M. and Martin, J. F. (2005). Distinct functions for Bmp signaling in lip and palate fusion in mice. *Development* **132**, 1453-1461.
- Maemura, K., Kurihara, H., Kurihara, Y., Oda, H., Ishikawa, T., Copeland, N. G., Gilbert, D. J., Jenkins, N. A. and Yazaki, Y. (1996). Sequence analysis, chromosomal location, and developmental expression of the mouse preproendothelin-1 gene. *Genomics* **31**, 177-184.

- Martinez-Barbera, J. P., Toresson, H., Da Rocha, S. and Krauss, S. (1997). Cloning and expression of three members of the zebrafish Bmp family: Bmp2a, Bmp2b and Bmp4. *Gene* **198**, 53-59.
- Miller, C. T., Schilling, T. F., Lee, K., Parker, J. and Kimmel, C. B. (2000). *sucker* encodes a zebrafish Endothelin-1 required for ventral pharyngeal arch development. *Development* **127**, 3815-3828.
- Miller, C. T., Yelon, D., Stainier, D. Y. and Kimmel, C. B. (2003). Two endothelin 1 effectors, *hand2* and *bapx1*, pattern ventral pharyngeal cartilage and the jaw joint. *Development* **130**, 1353-1365.
- Miller, C. T., Swartz, M. E., Khoo, P. A., Walker, M. B., Eberhart, J. K. and Kimmel, C. B. (2007). *mef2ca* is required in cranial neural crest to effect Endothelin1 signaling in zebrafish. *Dev. Biol.* **308**, 144-157.
- Nair, S., Li, W., Cornell, R. and Schilling, T. F. (2007). Requirements for Endothelin type-A receptors and Endothelin-1 signaling in the facial ectoderm for the patterning of skeletogenic neural crest cells in zebrafish. *Development* **134**, 335-345.
- Neidert, A. H., Virupannavar, V., Hooker, G. W. and Langeland, J. A. (2001). Lamprey Dlx genes and early vertebrate evolution. *Proc. Natl. Acad. Sci. USA* **98**, 1665-1670.
- Nie, X., Luukko, K. and Kettunen, P. (2006). BMP signalling in craniofacial development. *Int. J. Dev. Biol.* **50**, 511-521.
- Oka, K., Oka, S., Sasaki, T., Ito, Y., Bringas, P., Nonaka, K. and Chai, Y. (2007). The role of TGF-beta signaling in regulating chondrogenesis and osteogenesis during mandibular development. *Dev. Biol.* **303**, 391-404.
- Ozeki, H., Kurihara, Y., Tonami, K., Watatani, S. and Kurihara, H. (2004). Endothelin-1 regulates the dorsoventral branchial arch patterning in mice. *Mech. Dev.* **121**, 387-395.
- Pyati, U. J., Webb, A. E. and Kimelman, D. (2005). Transgenic zebrafish reveal stage-specific roles for Bmp signaling in ventral and posterior mesoderm development. *Development* **132**, 2333-2343.
- Ruest, L. B., Xiang, X., Lim, K. C., Levi, G. and Clouthier, D. E. (2004). Endothelin-A receptor-dependent and -independent signaling pathways in establishing mandibular identity. *Development* **131**, 4413-4423.
- Sato, T., Kawamura, Y., Asai, R., Amano, T., Uchijima, Y., Dettlaff-Swiercz, D. A., Offermanns, S., Kurihara, Y. and Kurihara, H. (2008). Recombinase-mediated cassette exchange reveals the selective use of Gq/G11-dependent and -independent endothelin 1/endothelin type A receptor signaling in pharyngeal arch development. *Development* **135**, 755-765.
- Schilling, T. F., Prince, V. and Ingham, P. W. (2001). Plasticity in zebrafish *hox* expression in the hindbrain and cranial neural crest. *Dev. Biol.* **231**, 201-216.
- Stottmann, R. W., Anderson, R. M. and Klingensmith, J. (2001). The BMP antagonists Chordin and Noggin have essential but redundant roles in mouse mandibular outgrowth. *Dev. Biol.* **240**, 457-473.
- Talbot, J. C., Johnson, S. L. and Kimmel, C. B. (2010). *hand2* and *Dlx* genes specify dorsal, intermediate and ventral domains within zebrafish pharyngeal arches. *Development* **137**, 2507-2517.
- Thesleff, I. and Sharpe, P. (1997). Signalling networks regulating dental development. *Mech. Dev.* **67**, 111-123.
- Thisse, C., Thisse, B., Schilling, T. F. and Postlethwait, J. H. (1993). Structure of the zebrafish *snail1* gene and its expression in wild-type, spadetail and no tail mutant embryos. *Development* **119**, 1203-1215.
- Thomas, T., Kurihara, H., Yamagishi, H., Kurihara, Y., Yazaki, Y., Olson, E. N. and Srivastava, D. (1998). A signaling cascade involving endothelin-1, dHAND and *msx1* regulates development of neural-crest-derived branchial arch mesenchyme. *Development* **125**, 3005-3014.
- Trainor, P. A. and Krumlauf, R. (2000). Patterning the cranial neural crest: hindbrain segmentation and Hox gene plasticity. *Nat. Rev. Neurosci.* **1**, 116-124.
- Tucker, A. S., Al Khamis, A. and Sharpe, P. T. (1998a). Interactions between Bmp-4 and Msx-1 act to restrict gene expression to odontogenic mesenchyme. *Dev. Dyn.* **212**, 533-539.
- Tucker, A. S., Matthews, K. L. and Sharpe, P. T. (1998b). Transformation of tooth type induced by inhibition of BMP signaling. *Science* **282**, 1136-1138.
- Tucker, A. S., Yamada, G., Grigoriou, M., Pachnis, V. and Sharpe, P. T. (1999). Fgf-8 determines rostral-caudal polarity in the first branchial arch. *Development* **126**, 51-61.
- Vainio, S., Karavanova, I., Jowett, A. and Thesleff, I. (1993). Identification of BMP-4 as a signal mediating secondary induction between epithelial and mesenchymal tissues during early tooth development. *Cell* **75**, 45-58.
- von Bubnoff, A., Peiffer, D. A., Blitz, I. L., Hayata, T., Ogata, S., Zeng, Q., Trunnell, M. and Cho, K. W. (2005). Phylogenetic footprinting and genome scanning identify vertebrate BMP response elements and new target genes. *Dev. Biol.* **281**, 210-226.
- Wada, N., Javidan, Y., Nelson, S., Carney, T. J., Kelsh, R. N. and Schilling, T. F. (2005). Hedgehog signaling is required for cranial neural crest morphogenesis and chondrogenesis at the midline in the zebrafish skull. *Development* **132**, 3977-3988.
- Walker, M. B. and Kimmel, C. B. (2007). A two-color acid-free cartilage and bone stain for zebrafish larvae. *Biotech. Histochem.* **82**, 23-28.
- Westerfield, M. (2000). *The Zebrafish Book. A Guide for the Laboratory Use of Zebrafish (Danio rerio)*, 4th edn. Eugene, OR: University of Oregon Press.
- Whyteside, A. R., Hinsley, E. E., Lambert, L. A., McDermott, P. J. and Turner, A. J. (2010). ECE-1 influences prostate cancer cell invasion via ET-1-mediated FAK phosphorylation and ET-1-independent mechanisms. *Can. J. Physiol. Pharmacol.* **88**, 850-854.
- Wilson, J. and Tucker, A. S. (2004). Fgf and Bmp signals repress the expression of *Bapx1* in the mandibular mesenchyme and control the position of the developing jaw joint. *Dev. Biol.* **266**, 138-150.
- Wu, X. and Howard, M. J. (2002). Transcripts encoding HAND genes are differentially expressed and regulated by BMP4 and GDNF in developing avian gut. *Gene Expr.* **10**, 279-293.
- Yanagisawa, H., Hammer, R. E., Richardson, J. A., Williams, S. C., Clouthier, D. E. and Yanagisawa, M. (1998a). Role of Endothelin-1/Endothelin-A receptor-mediated signaling pathway in the aortic arch patterning in mice. *J. Clin. Invest.* **102**, 22-33.
- Yanagisawa, H., Yanagisawa, M., Kapur, R. P., Richardson, J. A., Williams, S. C., Clouthier, D. E., de Wit, D., Emoto, N. and Hammer, R. E. (1998b). Dual genetic pathways of endothelin-mediated intercellular signaling revealed by targeted disruption of endothelin converting enzyme-1 gene. *Development* **125**, 825-836.
- Yanagisawa, H., Clouthier, D. E., Richardson, J. A., Charite, J. and Olson, E. N. (2003). Targeted deletion of a branchial arch-specific enhancer reveals a role of dHAND in craniofacial development. *Development* **130**, 1069-1078.
- Yao, L. C., Blitz, I. L., Peiffer, D. A., Phin, S., Wang, Y., Ogata, S., Cho, K. W., Arora, K. and Warrior, R. (2006). Schnurri transcription factors from Drosophila and vertebrates can mediate Bmp signaling through a phylogenetically conserved mechanism. *Development* **133**, 4025-4034.
- Ye, L., Lewis-Russell, J. M., Kyanaston, H. G. and Jiang, W. G. (2007). Bone morphogenetic proteins and their receptor signaling in prostate cancer. *Histol. Histopathol.* **22**, 1129-1147.
- Yelon, D., Ticho, B., Halpern, M. E., Ruvinsky, I., Ho, R. K., Silver, L. M. and Stainier, D. Y. (2000). The bHLH transcription factor *hand2* plays parallel roles in zebrafish heart and pectoral fin development. *Development* **127**, 2573-2582.
- Zuniga, E., Stellabotte, F. and Crump, J. G. (2010). Jagged-Notch signaling ensures dorsal skeletal identity in the vertebrate face. *Development* **137**, 1843-1852.
- Zuniga, E., Rippen, M., Alexander, C., Schilling, T. F. and Crump, J. G. (2011). Gremlin 2 regulates distinct roles of BMP and Endothelin 1 signaling in dorsoventral patterning of the facial skeleton. *Development* **138**, 5147-5156.
